# Multiplexed activation in mammalian cells using dFnCas12a-VPR

James W. Bryson<sup>1,2</sup>, Jamie Y. Auxillos<sup>3</sup>, Susan J. Rosser<sup>1,2\*</sup>

<sup>1</sup> Department of Quantitative Biology, Biochemistry and Biotechnology, University of Edinburgh, Edinburgh, United Kingdom.

<sup>2</sup> Centre for Synthetic and Systems Biology and UK Centre for Mammalian Synthetic Biology, School of Biological Sciences, University of Edinburgh, United Kingdom.

<sup>3</sup> Institute of Cell Biology, School of Biological Sciences, University of Edinburgh, Edinburgh, United Kingdom.

\* Corresponding author: [susan.rosser@ed.ac.uk](mailto:susan.rosser@ed.ac.uk)

## Abstract

The adoption of CRISPR systems for the generation of synthetic transcription factors has greatly simplified the process for upregulating endogenous gene expression, with a plethora of applications in cell biology, bioproduction and cell reprogramming. In particular the recently discovered Cas12a systems offer extended potential, as Cas12a is capable of processing its own crRNA array to provide multiple individual crRNAs for subsequent targeting from a single transcript. Here we show the application of dFnCas12a-VPR in mammalian cells, with FnCas12a possessing a shorter PAM sequence than As or Lb variants, enabling denser targeting of genomic loci. We observe that synergistic activation and multiplexing can be achieved using crRNA arrays but also show that crRNAs expressed towards the 5' of 6-crRNA arrays show evidence of enhanced activity. This not only represents a more flexible tool for transcriptional modulation but further expands our understanding of the design capabilities and limitations when considering longer crRNA arrays for multiplexed targeting.

## 32 **Introduction**

33

34 Synthetic transcription factors are modular proteins composed of DNA binding domains and  
35 transactivation domains, which enable up-regulation of targeted genes. Whilst a number of  
36 strategies have been developed (Becskei, 2020), the application of clustered regularly  
37 interspersed palindromic repeats (CRISPR) systems has greatly reduced the costs and  
38 complexity associated with generating synthetic transcription factors for targeting different  
39 loci (Pandelakis et al., 2020).

40

41 A hybridised CRISPR RNA (crRNA) and trans-activating crRNA (tracrRNA) enables  
42 targeting of the CRISPR associated protein 9 (Cas9) to a specific locus (Jinek et al., 2012).  
43 The spacer sequence within the crRNA confers target specificity, with binding and cleavage  
44 only occurring if the spacer sequence is complementary to the target sequence. There must  
45 also be a protospacer adjacent motif (PAM) sequence, which varies based on the Cas9  
46 species of origin, adjacent to the target sequence. If the PAM sequence is present, then Cas9  
47 can transiently melt the DNA to enable infiltration by the spacer sequence (Anders et al.,  
48 2014). Subsequently, if the spacer is complementary to the target sequence, then Cas9 will  
49 bind and cleave the target DNA.

50

51 The generation of a DNase inactive Cas9 variant (dCas9) has subsequently enabled the  
52 creation of RNA guided DNA binding domains, where the specificity of genome targeting  
53 can be altered by changing the 20 nt spacer sequence within a single guide RNA (sgRNA)  
54 composed of a fused crRNA and tracrRNA (Mali et al., 2013). A number of groups have  
55 subsequently generated synthetic transcription factors by fusing transactivation domains to  
56 dCas9 (Gilbert et al., 2013; Hilton et al., 2015). Cas9 derived synthetic transcription factors  
57 have been employed for a number of applications including; genetic circuits (Nakamura et  
58 al., 2019), cell reprogramming (Chakraborty et al., 2014) and biosensors (Krawczyk et al.,  
59 2020).

60

61 It is important to note that Cas9 represents only one of a variety of known CRISPR systems,  
62 with others possessing divergent and useful properties. In particular Cas12a/Cpf1, similarly  
63 to Cas9, functions as an RNA guided homing endonuclease. However, unlike Cas9, Cas12a  
64 can be targeted by a single crRNA (~40 nt) as opposed to requiring a combined crRNA and

65 tracrRNA (~100 nt) (Zetsche et al., 2015). Furthermore, in contrast to Cas9, Cas12a  
66 possesses RNase activity and can recognise and process an array of adjacent crRNAs within a  
67 single transcript to enable targeting of the protein to multiple unique loci (Fonfara et al.,  
68 2016).

69

70 Whilst work has been carried out to generate synthetic transcription factors using DNase dead  
71 dCas12a variants from *Acidaminococcus* sp. BV3L6 and *Lachnospiraceae bacterium* ND206  
72 (AsCas12a and LbCas12a respectively) (Tak et al., 2017), the related *Francisella novicida*  
73 variant (FnCas12a) has remained understudied, as initial work suggested it may not cut DNA  
74 *in vivo* (Zetsche et al., 2015). However subsequent work by Kim *et al.* showed it did possess  
75 activity in mammalian cells (Kim et al., 2016). FnCas12a was initially characterised as  
76 having a shorter PAM sequence than AsCas12a or LbCas12a *in vitro* (Zetsche et al., 2015).  
77 Subsequent cleavage assays in mammalian cells has shown a PAM sequence  
78 ‘K(G/T)Y(C/T)TV(A/C/G)’ enables optimal targeting for FnCas12a (Tu et al., 2017),  
79 compared to ‘TTTV’ for both AsCas12a and LbCas12a (Kim et al., 2017). ‘KYTV’ can on  
80 average be found every 21 nt. This targeting density is highly comparable to the targeting  
81 capacity of SpCas9 which has a PAM sequence ‘NGG’, which can on average be found every  
82 16 nt. In contrast, the As/LbCas12a PAM sequence ‘TTTV’ can only be found on average  
83 every 85 nt.

84

85 The ability to target more synthetic transcription factors to a specific genomic region  
86 becomes essential in cases where narrow windows of targeting are optimal and in particular,  
87 when carrying out multiplexed targeting. One clear example is the case of gene network  
88 manipulation, where; 1) there is a 350 nt window within the promoter region where optimal  
89 transactivation is observed (Gilbert et al., 2014), 2) multiple promoters will be  
90 simultaneously targeted and 3) multiple studies including this work show that targeting more  
91 than one copy of the synthetic transcription factor to the same promoter can enable enhanced  
92 transactivation (Maeder et al., 2013; Tak et al., 2017).

93

94 In the following work we show that FnCas12a can be engineered and applied as a synthetic  
95 transcription factor in mammalian cells, before subsequently exploring whether dFnCas12a-  
96 VPR shows orthogonality when screened alongside dAsCas12a-VPR and dLbCas12a-VPR.  
97 We then test whether single crRNAs are sufficient for gene activation and look for  
98 synergistic transactivation when multiple crRNA target a single promoter. We further explore

99 multiplexed activation from single crRNA arrays. Finally, we look into the role of position of  
100 targeting crRNA within 6-crRNA arrays on the capacity to transactivate targeted genes.

101

## 102 **Results**

### 103 **1 – dFnCas12a-VPR transactivates Luciferase plasmid reporter in mammalian cells**

104

105 To assess the capability of different Cas12a systems to be adapted as synthetic transcription  
106 factors, three variants of Cas12a were chosen. The As, Lb and Fn variants were selected due  
107 to their well characterised nature (As and Lb) or the wide targeting range of the PAM  
108 sequence (Fn). DNase inactive variants were generated before the VPR transactivation  
109 domain was cloned onto the 3' end of each dCas12a.

110

111 The three variants (As, Fn and Lb) were initially screened alongside dCas9-VPR using a dual  
112 luciferase assay. Utilising a dual plasmid reporter system (Kleinjan et al., 2017), each of the  
113 dCas12a-VPR constructs and dCas9-VPR were targeted upstream of a Firefly luciferase gene  
114 using the respective crRNAs (dCas12a-VPR variants) or sgRNA (dCas9-VPR) (Figure 1A).

115

116 The plasmids expressing the synthetic transcription factor and crRNA/sgRNA were co-  
117 transfected alongside the targeted Firefly luciferase plasmid and a control *Renilla* luciferase  
118 plasmid (Figure 1B) into HEK293 cells. Two days post-transfection the ratio of the targeted  
119 Firefly luciferase to the normalising *Renilla* luciferase was measured for each variant. Of  
120 interest the Fn variant of dCas12a-VPR appeared to perform best when compared to dCas9-  
121 VPR (Figure 1C), showing significant transactivation (62 fold,  $P = 0.027$  based on two-tailed  
122 students t-test).

123

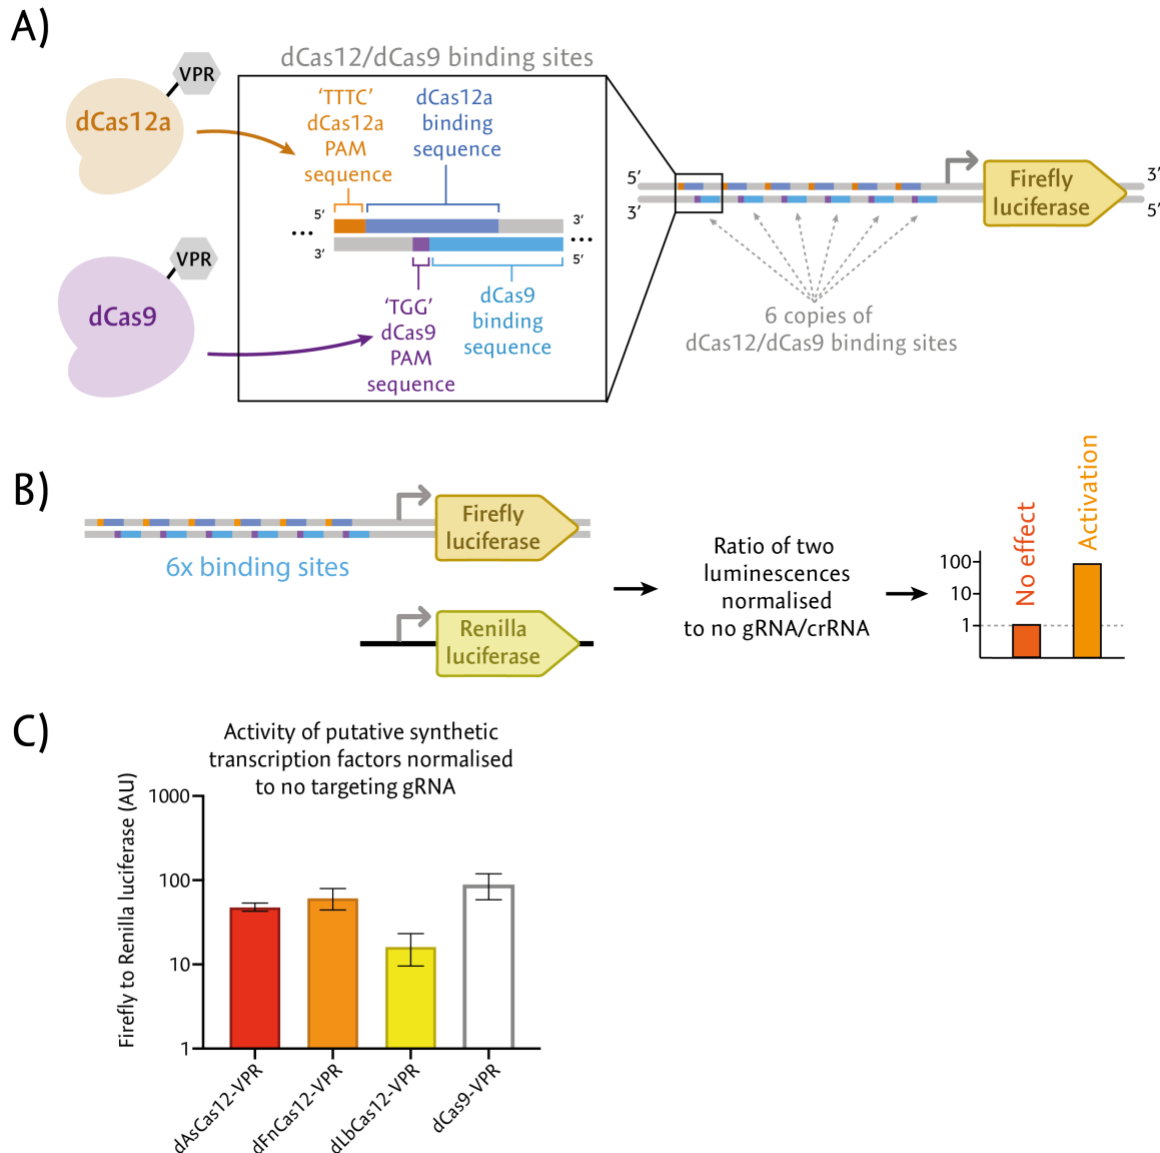

124

125 **Figure 1 – Screening dCas12a-VPR constructs using plasmid-based Firefly luciferase reporter**

126 **A)** Schematic representation of the targeted promoter region within the Firefly Luciferase reporter plasmid.

127 The top strand of the promoter region contains six repeated binding sequences for the dCas12a constructs

128 (dark blue) with adjacent PAM sequences that can be recognised by all three variants 'TTTC' (orange).

129 The bottom strand of the promoter region contains 6 repeated binding sequences for dCas9-VPR (light

130 blue) with adjacent PAM sequences that can be recognised by dCas9-VPR (purple). **B)** Diagrammatic

131 representation of the dual luciferase reporter assay. Alongside the targeted Firefly luciferase reporter

132 plasmids, a non-targeted *Renilla* luciferase plasmid was delivered to enable normalisation of the relative

133 Firefly luciferase activity between test and control conditions. If a putative synthetic transcription factor

134 was able to transactivate the targeted Firefly luciferase gene, then the ratio of Firefly to *Renilla* luciferase

135 activity would be increased compared to the negative control condition. **C)** Testing the three dCas12a-VPR

136 variants alongside dCas9-VPR using the dual luciferase assay. Each construct is delivered with a targeting

137 crRNA/gRNA and the resulting ratio is normalised to the ratio when delivered without a crRNA/gRNA.  
138 The results represent three biological replicates and the error bars display the SEM.

139

## 140 2 – Orthogonality observed between dCas12a-VPR variants

141

142 We subsequently sought to test for orthogonality between the three dCas12a-VPR variants  
143 (Figure 2A). The activity of each variant when delivered with crRNAs from each of the  
144 variants or none was measured using the dual luciferase assay previously described (Figure  
145 1B).

146

147 We observe evidence of cross-reactivity between the As and Fn variants of dCas12a-VPR,  
148 with dAsCas12a-VPR targeted with the Fn crRNA showing significant transactivation ( $P =$   
149 0.003). Of interest the Fn and Lb variants do not show evidence of cross reactivity,  
150 suggesting they could serve as an orthogonal pair (Figure 2B).

151

152

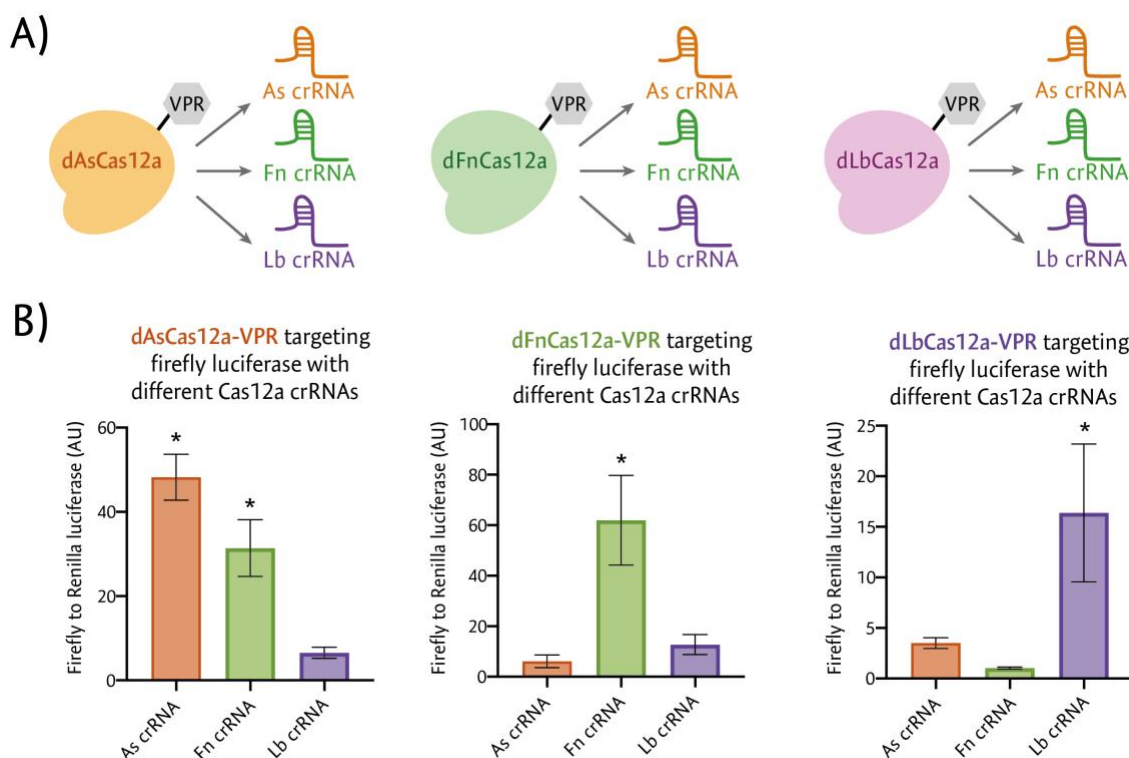

153

## 154 Figure 2 – Testing for orthogonality between different dCas12a-VPR variants

155 **A)** Schematic representation of the testing of orthogonality using either native (e.g. dAsCas12a-VPR with  
156 As crRNA) or non-native (e.g. dAsCas12a-VPR with Fn crRNA) crRNA pairings. **B)** The three dCas12a-

157 VPR variants (As, Fn and Lb) were screened for orthogonality using the dual luciferase assay. Each  
158 dCas12a-VPR construct was delivered with each of the three targeting crRNA (As, Fn or Lb) or no  
159 targeting crRNA. Results display the mean luciferase activity relative to no targeting crRNA from three  
160 biological replicates. Error bars show SEM and the stars (\*) denote significant ( $P < 0.05$ ) expression  
161 relative to no crRNA (based on a post hoc Dunnetts test).

162

163

### 164 **3 - Single crRNAs are sufficient for transactivation of endogenous genes**

165

166 Having demonstrated the activity of dFnCas12a-VPR using a plasmid-based reporter, we  
167 next sought to test whether transactivation of endogenous genes could be achieved. The three  
168 genes *HBB*, *ASCL1* and *ILIRN* were chosen for targeting as they had been found to be  
169 especially amenable to transactivation when targeted with dCas9 based synthetic  
170 transcription factors (Perez-Pinera et al., 2013). Six crRNAs were designed to target each of  
171 the three associated promoters. The crRNAs were designed to utilise a 'TTV' PAM sequence  
172 within a window 50 to 300 nt upstream of the transcription start site (TSS), identified using  
173 Fantom5 (Lizio et al., 2015) (Figure 3A). This window was selected as previous work had  
174 shown maximal transactivation of endogenous genes was obtained when targeting this  
175 window with a Cas9 derived synthetic transcription factor (Gilbert et al., 2014).

176

177 The crRNA plasmids were individually transfected alongside dFnCas12a-VPR into HEK293  
178 cells before extracting the total RNA three days post transfection followed by qRT-PCR.  
179 When assessing the gene expression across all three genes, at least one crRNA for each  
180 promoter showed significant transactivation (Figure 3B). Statistically significant  
181 transactivation was observed for; *HBB* crRNA 1 ( $P = 0.0028$ ), *HBB* crRNA 2 ( $P = 0.0011$ ),  
182 *HBB* crRNA 4 ( $P = 0.0253$ ), *ASCL1* crRNA 2 ( $P = 0.0003$ ) and *ILIRN* crRNA 2 ( $P =$   
183  $0.0002$ ).

184

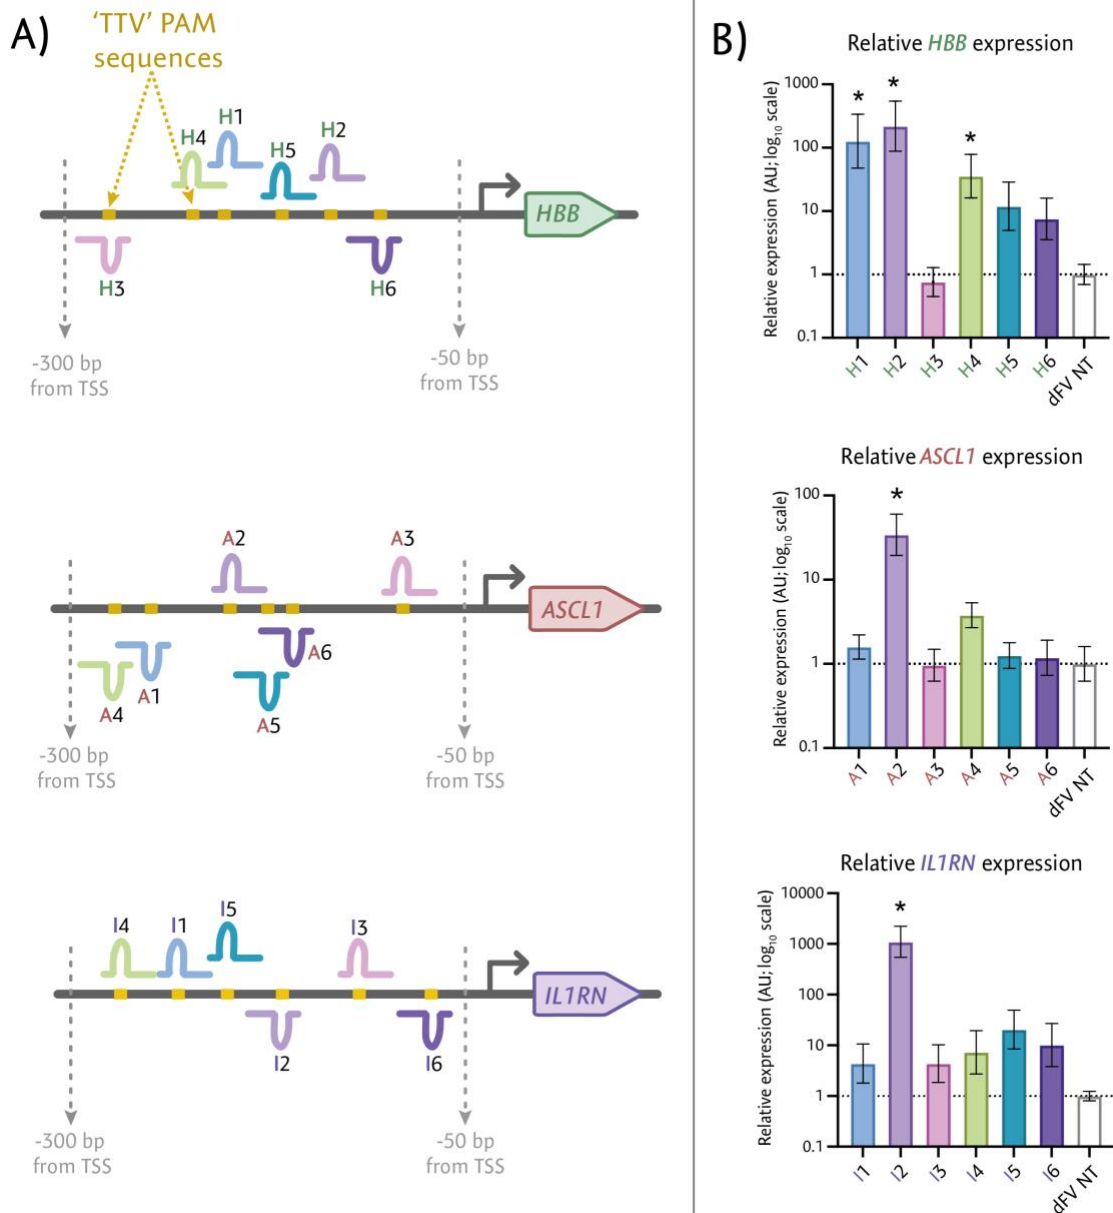

185

186 **Figure 3 – Testing single crRNAs for endogenous gene activation**

187 A) dFnCas12a-VPR was screened for activity targeting 3 endogenous genes; *HBB*, *ASCL1* and *IL1RN* in  
 188 HEK293 cells using single crRNAs. The promoter of each gene was targeted with six single crRNAs and  
 189 transcriptional upregulation was compared to a non-targeting (NT) crRNA. B) The change in transcript  
 190 abundance was then measured using qRT-PCR, with results shown for the three biological replicates. Stars (\*)  
 191 show results with a P value < 0.05 after one-way ANOVA followed by a post-hoc Dunnetts test to compare  
 192 the expression of each targeting crRNA relative to the non-targeting negative control.

193

194

195 **4 – Targeting multiple crRNAs enhances transactivation with evidence for synergy**

196



197 Having shown that targeting dFnCas12a-VPR using single crRNAs was sufficient for  
198 transactivation, we next explored if the targeting of multiple crRNAs to the same promoter  
199 further enhanced gene expression synergistically. For each gene, the two individual crRNAs  
200 that showed the highest fold up-regulation were screened for transactivation, comparing their  
201 activity when co-transfected compared to individually transfected. For *HBB* and *ILIRN* a  
202 further crRNA pair was selected from crRNAs which had shown either weak or no  
203 significant transactivation (H4 + H5 and I4 + I6). To enable assessment of the relative impact  
204 of delivering two crRNAs compared to individual crRNAs, equimolar concentrations of  
205 crRNA plasmids were delivered to HEK293 cells.

206

207 Analysis by qRT-PCR showed the mean increase in mRNA abundance for the co-transfected  
208 condition was consistently higher than the most active individual crRNA (Figure 4A). When  
209 a two tailed t-test between the co-transfected and most active individual crRNA conditions  
210 was performed, we saw a significant increase in mRNA abundance for; *HBB* crRNA 1 + 2 ( $P$   
211 = 0.017), *ASCL1* crRNA 2 + 4 ( $P$  = 0.001), and *ILIRN* crRNA 4 + 6 ( $P$  = 0.005). We also  
212 observed a non-significant increase in mRNA abundance for *HBB* crRNA 4 + 5 ( $P$  = 0.0875).  
213 For one of the tested crRNA pairs (*ILIRN* crRNA 2 and 5) the spacer sequences had partial  
214 complementarity (12 nucleotides). This may explain the small decrease in mRNA abundance  
215 observed when comparing co-transfection to *ILIRN* crRNA 2 individually (non-significant,  $P$   
216 = 0.117). As a result, the *ILIRN* crRNA 2 + 5 pair was excluded from subsequent analysis.

217

218 As one of the advantages of Cas12a is the capacity to process crRNA arrays, we sought to  
219 test whether 2-crRNA arrays, consisting of a pair of crRNAs in tandem, could be utilised by  
220 dFnCas12a-VPR for transactivating target genes and whether these short arrays would enable  
221 increased or synergistic activation compared to the delivery of individual crRNAs. To test  
222 this, 2-crRNA arrays were constructed using the most active crRNA pairs from the preceding  
223 experiments. Three days after transfection into HEK293 cells, the fold upregulation induced  
224 using these arrays was tested compared to the co-transfected crRNAs and a non-targeting  
225 crRNA control. We consistently observed that the crRNA arrays performed as well if not  
226 better than the co-transfected crRNAs, with a higher mean fold upregulation for the arrays  
227 compared with the co-transfected crRNAs in all cases (Figure 4B).

228

229 We subsequently sought to test the crRNA arrays for evidence of synergistic transactivation.  
230 Synergy is here defined as showing greater transactivation than would be expected from

231 adding the transactivation caused by each individual crRNA. To test this a hypothetical  
232 additive distribution was calculated by adding the distributions for the single crRNA  
233 conditions (Supplementary Note 1). Two tailed t-tests were then used to check whether  
234 significantly greater activation was seen for the array conditions than their respective  
235 hypothetical additive distributions. We saw that synergy was indeed observed for two of the  
236 cases, *HBB* (1+2) array (P = 0.0027) and *HBB* (4+5) array (P = 0.0027) (Supplementary  
237 Figure 1). Significance was not achieved for the *ASCL1* array (P = 0.1891) or the *IL1RN*  
238 array (P = 0.1069).  
239

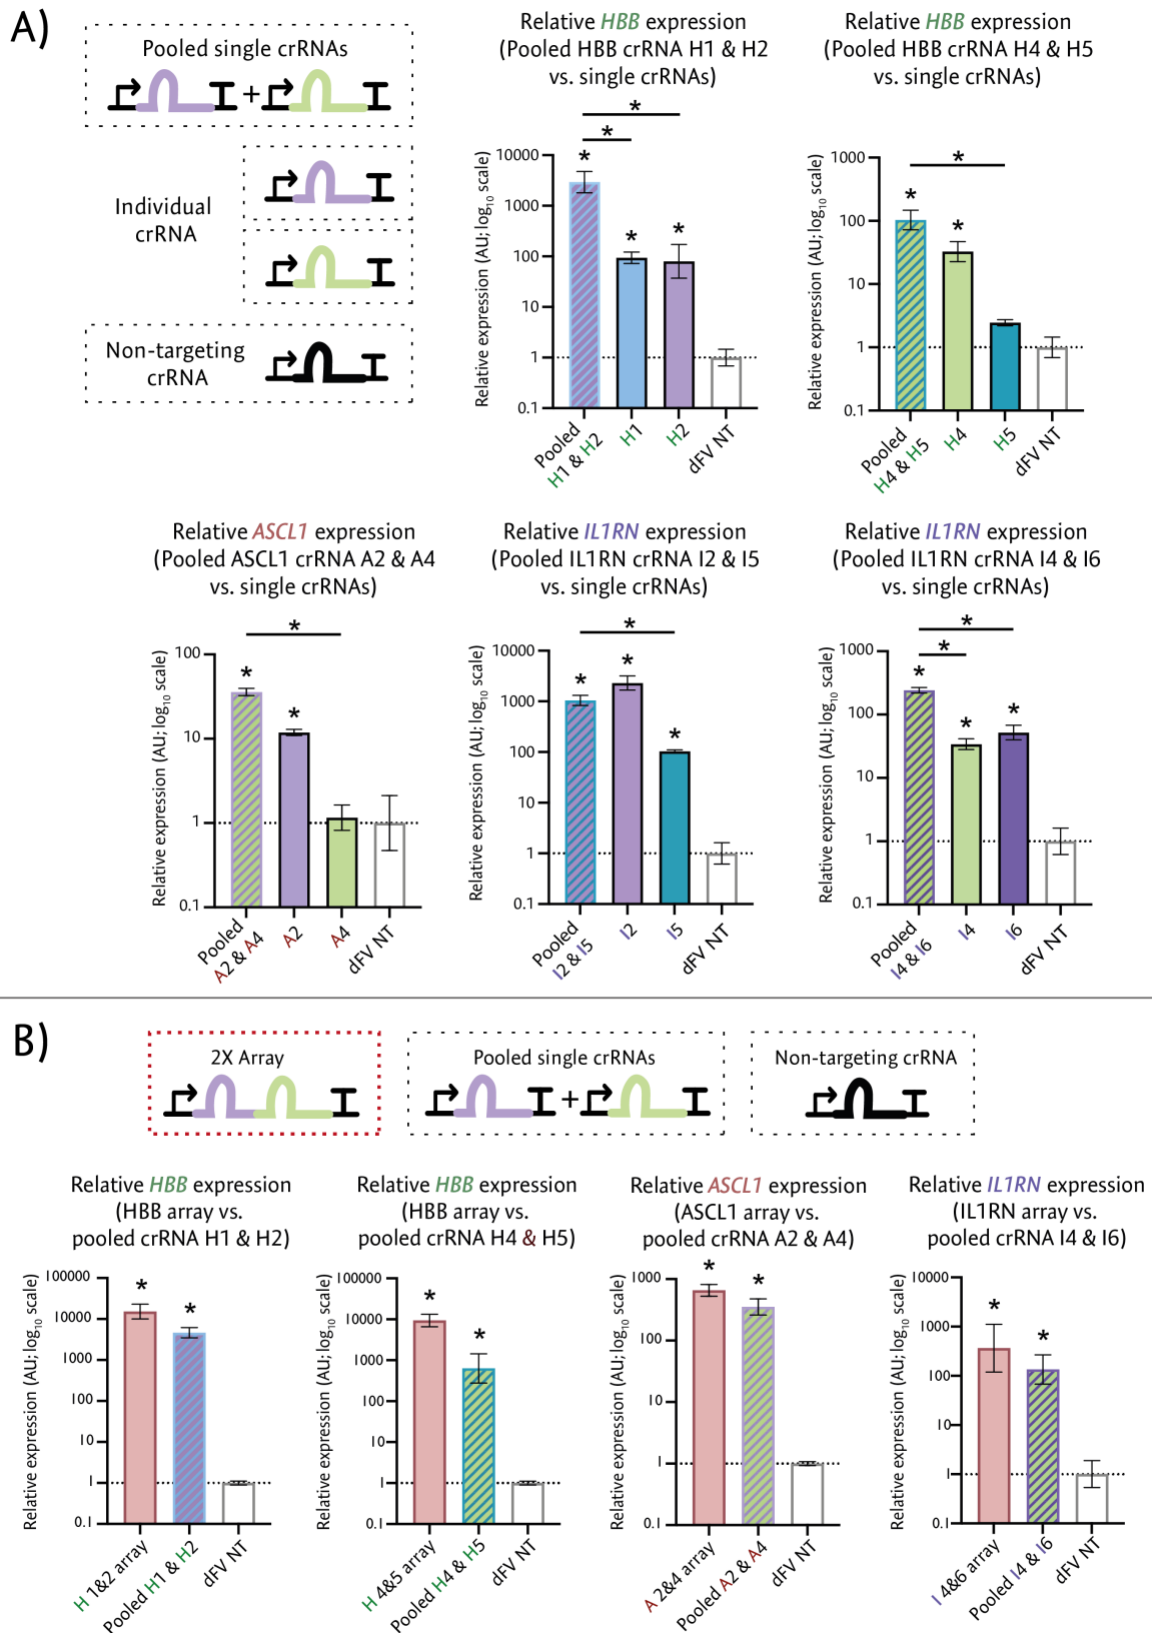

240

241 **Figure 4 – Enhanced activation observed with co-expression of targeting crRNAs**

242 **A)** The most active individual crRNAs (from Figure 3) were delivered individually or co-transfected into

243 HEK293 cells. The RNA abundance for each targeted gene was then measured by qRT-PCR and normalised to

244 RNA expression when dFnCas12a-VPR was delivered with a non-targeting (NT) crRNA. The pair *ILIRN*  
245 crRNA 2 and *ILIRN* crRNA 5 were excluded as the spacer sequences overlapped. **B)** The crRNA pairs were  
246 incorporated into a single 2-crRNA array and the activity of this array was screened compared to co-transfection  
247 of the single crRNAs. Results from three biological replicates were measured by qRT-PCR and normalised to  
248 delivery with a non-targeting crRNA, with stars (\*) showing results with a P value < 0.05.

249

250

## 251 **5 – Multiplexed activation from crRNA arrays**

252

253 Having observed that transactivation of individual genes could be achieved using arrays with  
254 dFnCas12a-VPR, we next sought to test longer arrays designed to target multiple genes  
255 simultaneously, while exploring the impact of crRNA order within the array on activity. To  
256 achieve this, the most active crRNA arrays from the previous experiment (Figure 5A) were  
257 utilised for the generation of 6-crRNA arrays. Six different arrays were designed with three  
258 pairs of crRNAs, such that each pair targeted one of three promoters (Figure 5A). Using this  
259 design, all six combinations could be explored to not only test for significant multiplexed  
260 activation but also test whether changing the position or flanking crRNA sequences impacted  
261 the capacity of a crRNA array to induce transactivation. When screening mRNA abundance  
262 for each of the three genes, the results showed that each crRNA array was able to  
263 significantly up-regulate transcription for every gene (Figure 5B).

264

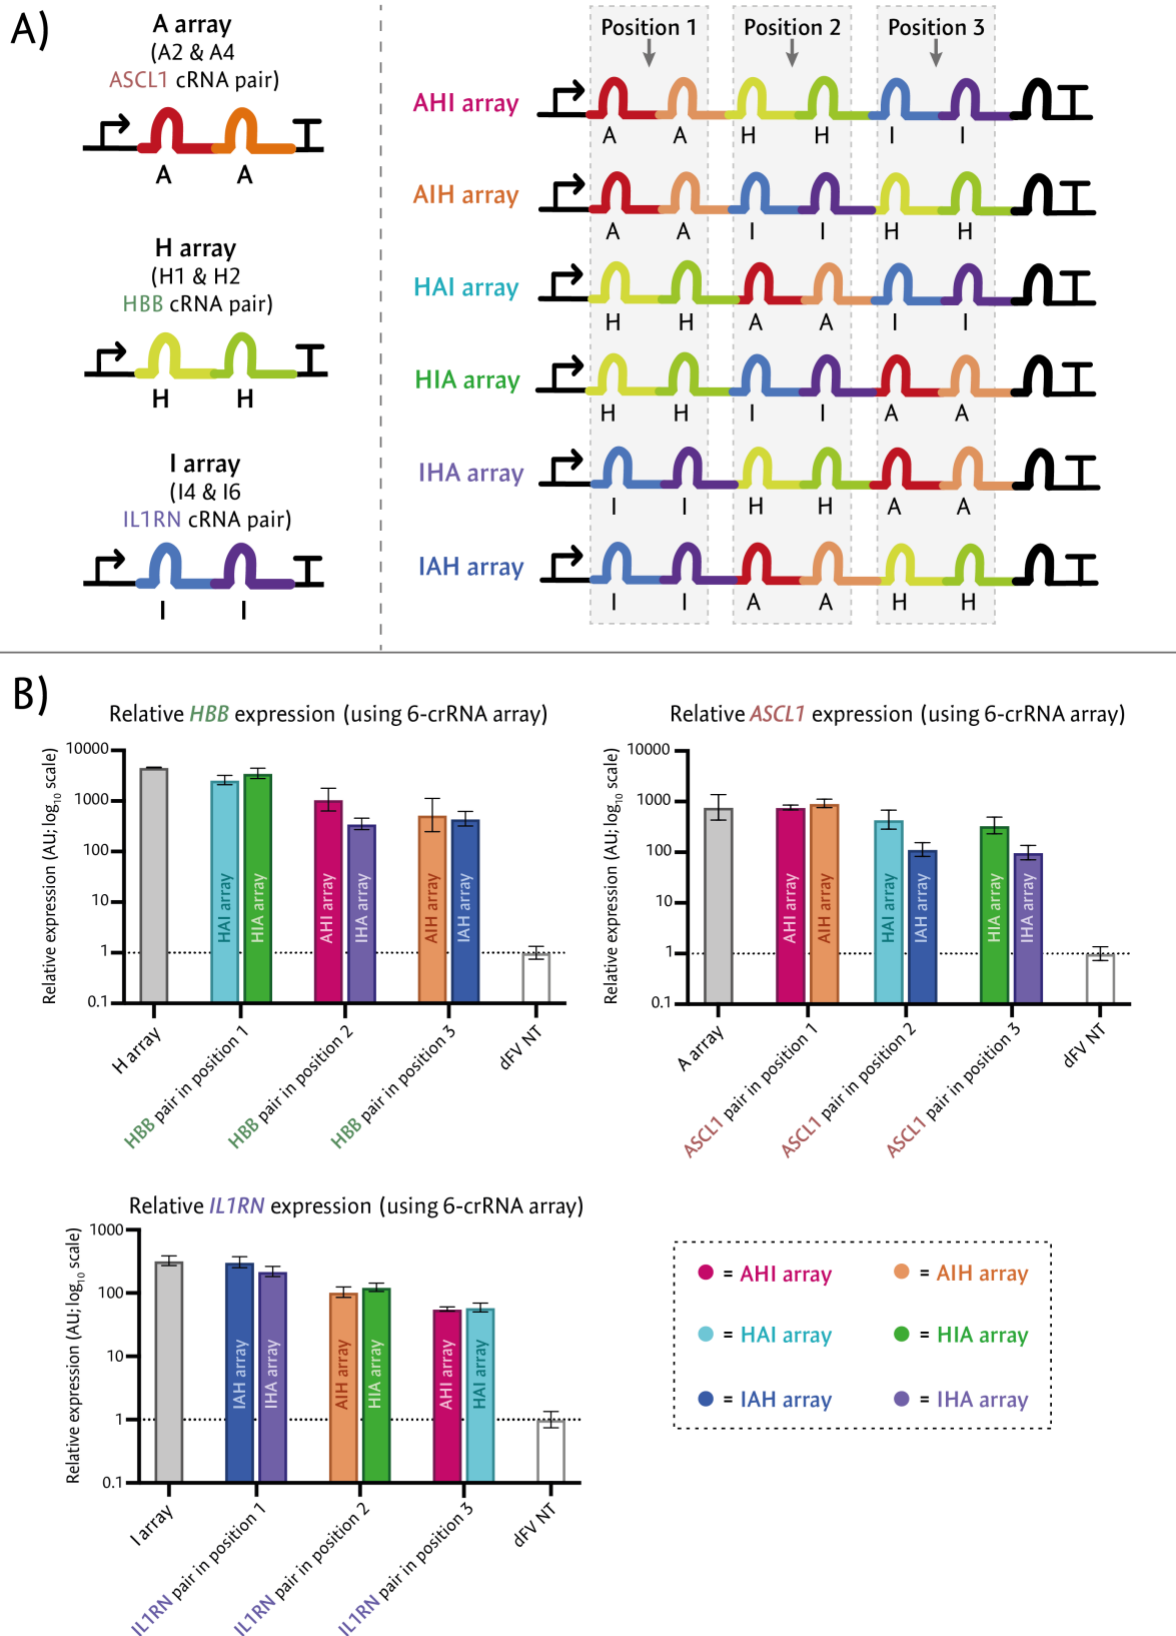

265

266 **Figure 5 – Multiplexed activation of endogenous genes**

267 A) The left panel shows a schematic of the most active crRNA array for targeting each of the three genes from

268 Figure 4B. The right panel shows the designs of the combinatorial 6-crRNA arrays for screening for multiplexed

269 activation. The six arrays were designed to ensure each of the pairs of crRNAs would be present in the first and  
270 second, third and fourth or fifth and sixth positions within the 6-crRNA arrays. **B)** The six arrays were  
271 separately transfected into HEK293 cells alongside dFnCas12a-VPR and the expression for each of the three  
272 targeted genes was assessed by qRT-PCR, normalising to the expression with a non-targeting crRNA. The  
273 results from the three biological replicates are displayed based upon the position of the respective targeting  
274 crRNAs within the 6-crRNA arrays.

275

276

## 277 **6 – Modest order dependent array activity observed for individual and paired crRNA**

278

279 For all three genes targeted, there appeared to be a clear correlation between the position of  
280 the targeting crRNAs within the arrays and the fold up-regulation. More specifically when  
281 the gene targeting crRNAs were positioned closer to the 3' end of the array, increases in  
282 mRNA abundance were consistently diminished across all three genes tested (Figure 5B).  
283 When simple linear regression was performed, a weak inverse correlation between the  
284 targeting crRNA position within an array and gene activation of the targeted gene was  
285 observed for *ASCLI* and *HBB* ( $R^2 = 0.4160$ ,  $P = 0.0039$  and  $R^2 = 0.4876$ ,  $P = 0.0013$   
286 respectively) and a strong inverse correlation was observed for *ILIRN* ( $R^2 = 0.8457$ ,  $P <$   
287  $0.0001$ ) (Supplementary Figure 1).

288

289 To further investigate this phenomenon, a series of crRNA arrays were generated where each  
290 array possessed a single targeting crRNA and five non-targeting crRNAs. The non-targeting  
291 crRNAs were rationally designed from different randomly generated 20 nucleotide  
292 sequences, that showed no perfect matches against the human genome.

293

294 Six different versions of the array were generated so that all positions of the targeting crRNA  
295 (*ASCLI* crRNA 2) within the array could be tested (Figure 6A). The capacity of the each  
296 crRNA array to up-regulate *ASCLI* expression was then measured as previously described.  
297 The results showed a reduction in transactivation of *ASCLI* as the targeting crRNA was  
298 positioned closer to the 3' of the array, with the highest mean fold-upregulation (103-fold)  
299 when the crRNA was at the first (most 5') position and the lowest fold up-regulation (29-  
300 fold) when the crRNA was at the last position (most 3') (Figure 6B). When simple linear  
301 regression was performed, a weak reduction in activity when the targeting crRNAs were  
302 positioned towards the 3' of the arrays was observed ( $R^2 = 0.3671$ ,  $P = 0.0077$ )  
303 (Supplementary Figure 2).

304

305

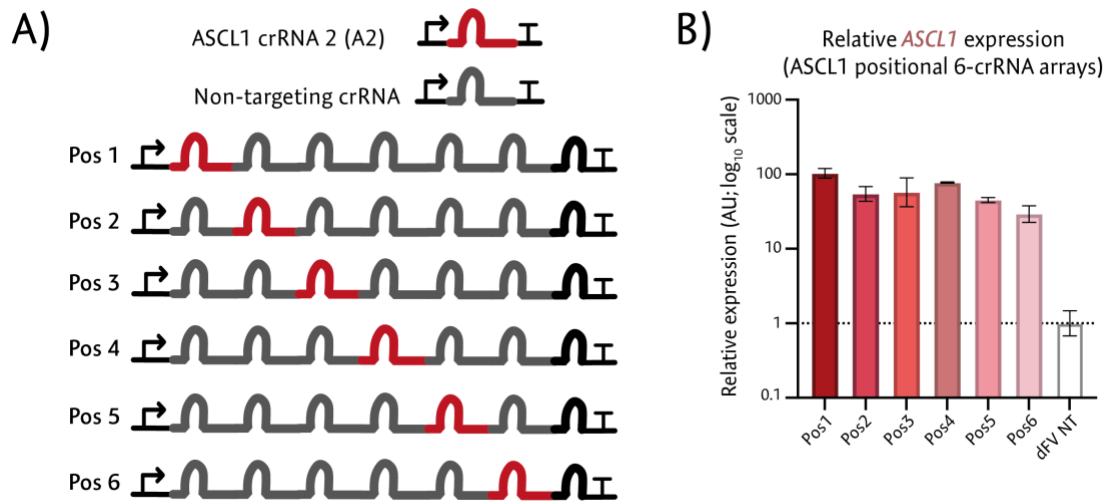

306

307 **Figure 6 - Position dependent activity within pol3 derived crRNA arrays**

308 a) Design of arrays constructed for testing the impact of position for a single targeting crRNA within a 6-crRNA  
309 array. b) qRT-PCR analysis of *ASCL1* mRNA abundance for the six arrays after transfection into HEK293 cells,  
310 with the graph showing results from the three biological replicates.

311

## 312 Discussion

313

314 Here we have shown the first application of engineering FnCas12a derived synthetic  
315 transcription factors in mammalian cells. The key advantage of the Fn variant is the simpler  
316 PAM sequence 'KYTV' when compared to the commonly utilised As or Lb variants 'TTTV'.  
317 This translates to being able to target on average every 21 nt as opposed to on average every  
318 85 nt, highly comparable to the Cas9 PAM sequence 'NGG' which enables targeting on  
319 average every 16 nt. This allows much denser targeting, with more potential targets within  
320 any given length of DNA. This is of particular interest for transactivation of target genes as  
321 we have also highlighted that delivery of multiple active crRNAs targeting the same promoter  
322 region further enhances up-regulation.

323

324 We found that dFnCas12a-VPR can be used for multiplexed transactivation of three different  
325 genes from a single transcript. We have consistently observed a reduction in activity for  
326 crRNAs positioned closer to the 3' of crRNA arrays expressed from the U6 pol 3 promoter.  
327 This information can inform design constraints when targeting multiple genes for

328 upregulation from a single array. In particular, arrays can be designed to express crRNAs  
329 closer to the 5' end of an array where they target genes that are challenging to upregulate or  
330 where higher overexpression is desired. Conversely, crRNAs targeting genes that are easier  
331 to up-regulate or where lower over-expression is desired can be positioned closer to the 3'  
332 end of an array.

333

334 One likely explanation for the reduction of activity as the crRNA is positioned closer to the  
335 3' end of the array is that crRNA abundance is reduced. Zetsche *et al.* showed with RNA-seq  
336 data a decreased crRNA abundance towards the 3' of a 3-crRNA array when expressed in  
337 HEK293 cells (Zetsche et al., 2017). This may be due to the presence of a weak non-  
338 canonical Pol III terminator sequence 'TTTCT' (Orioli et al., 2011) within all of the direct  
339 repeats within the crRNA array.

340

341 Through this expansion of the Cas12a toolkit researchers should be able to more easily  
342 simultaneously transactivate multiple genes, with the capacity to densely target multiple  
343 promoters. In addition, the compact nature of the crRNA array both facilitates cheap and easy  
344 assembly using short oligo-based assembly strategies. Furthermore the compact arrays  
345 expand the potential of CRISPR systems when considering AAV viral delivery for  
346 therapeutic applications (which has a packaging size limit of 4.2Kbp) when paired with split  
347 Cas12a strategies (Kempton et al., 2020).

348

349 Whilst previous work has explored the role of PAM selection (Jacobsen et al., 2020) and  
350 spacer sequence choice (Creutzburg et al., 2020) on crRNA activity, to our knowledge this is  
351 the first time where order dependent activity for hU6 expressed crRNA arrays have been  
352 shown. This is of key relevance to researchers as U6 promoters naturally highly express short  
353 non-coding RNA, with a defined termination sequence of five thymidines. As such the  
354 majority of crRNA expression plasmids utilise this promoter and the findings of order  
355 dependent activity will have relevance to researchers working with Cas12a or derived  
356 synthetic transcription factors. In particular the order dependent activity of crRNAs within an  
357 array also opens up the possibility of diversifying the fold change of transactivation  
358 of different genes within genetic networks and pathways.

359

360 This may open up opportunities for streamlined manipulation of pathways where for example  
361 the promoters of multiple genes within a pathway can be targeted by the same crRNA but



362 in different orderings. Subsequent sequencing of high production strains can reveal the  
363 enrichment of order for specific crRNAs, which in turn reveals when higher transactivation  
364 or reduced transactivation of a specific gene with a pathway are being selected for. This in  
365 turn can help to reveal key bottlenecks or toxicities that emerge within a pathway. A similar  
366 approach can be considered for processes such as cell reprogramming and indeed any process  
367 where transcriptional modulation of a gene network can be correlated with a phenotype.

368

## 369 **Materials and Methods**

370

### 371 **Plasmid construction**

372 Isothermal mutagenesis was used to introduce amino acid substitutions; D908A for  
373 AsCas12a, D917A for FnCas12a and D832A for LbCas12a. Mutation of this highly  
374 conserved amino acid has previously been shown to abolish DNase activity (Zetsche et al.,  
375 2015). The VPR transactivation domain was subcloned onto the 3' of each dCas12a from  
376 dCas9-VPR, restriction ligation.

377

378 Single crRNA plasmids and crRNA arrays were generated by first annealing oligos ordered  
379 from IDT (Integrated DNA Technologies). The annealed oligos were then ligating into the  
380 BpiI (Thermo Scientific cat #ER1012) digested pU6 plasmid backbone using 1µl of T4 PNK  
381 (NEB cat #M0201L) and 1µl of T4 ligase (NEB cat #M0202L) in a 20µl reaction, incubated  
382 at 37°C for 30 minutes before transforming into *E.coli*.

383

### 384 **Cell culturing and transfection**

385 HEK293 cells were cultured in DMEM (Gibco; Life Technologies) with 10% FBS (Gibco;  
386 Life Technologies), 4mM glutamine and 1% penicillin-streptomycin (Gibco; Life  
387 Technologies). Transfections were carried out a day after seeding ~200,000 cells per well  
388 into 24 well plates. Transfections were performed using either lipofectamine 2000 (luciferase  
389 assays) or GenJet In vitro transfection reagent (qRT-PCRs). For the initial luciferase assays  
390 200ng of the synthetic transcription factor was transfected with 100ng of the gRNA/crRNA  
391 plasmids. For the qRT-PCR assays 500ng of the synthetic transcription factor was transfected  
392 with 250ng of the gRNA/crRNA plasmids.

393

394

395 **Dual luciferase assay**

396 HEK293 cells were transfected with a Firefly luciferase reporter construct, Renilla luciferase  
397 normalising construct and the respective synthetic transcription factor construct, with or  
398 without a targeting crRNA/gRNA plasmid. Firefly luciferase expression and Renilla  
399 luciferase expression were then assessed using the dual-luciferase kit (Promega E1910) with  
400 measurements carried out with the Modulus II microplate reader (Turner Biosystems). In all  
401 cases cells were lysed in passive lysis buffer 48 hours after transfection.

402

403 **RNA extraction and cDNA generation**

404 72 hours after transfection cells were harvested and RNA extraction was performed using  
405 E.Z.N.A Total RNA Kit 1 (Omega Biotek cat #R6834-01). cDNA generation was performed  
406 using SuperScript IV Reverse Transcriptase (Invitrogen). 1 µg of RNA was mixed with 1µl  
407 of 50µM oligo d(T)20 (IDT), 1µl of 10mM dNTP mix (Promega cat #U1240) and DEPC  
408 water up to a final volume of 13µl in a PCR tube and incubated at 65°C for 5 minutes then on  
409 ice for 1 minute. The following components were added to each sample: 4µl of SuperScript  
410 IV Reverse Transcriptase buffer, 1µl of 0.1 M DTT, 1ul of dH2O, 0.5µl of RiboLock RNase  
411 Inhibitor (Invitrogen) and 0.5µl of SuperScript IV Reverse Transcriptase (Invitrogen). The  
412 reactions were then incubated at 52°C for 10 minutes followed by 80°C for 10 minutes and  
413 holding at 4°C.

414

415 Unless otherwise stated, cells were harvested three days post transfection using E.Z.N.A  
416 Total RNA Kit 1 (Omega Biotek cat #R6834-01) according to the manufacturer's  
417 instructions. The concentration and RNA quality was assessed using the nanodrop.

418

419 1µl of 50µM oligo d(T)20 (IDT) and 1µl of 10mM dNTP mix (Promega cat #U1240) were  
420 combined with 1 µg of RNA before adding dd H<sub>2</sub>O up to a final volume of 13µl. cDNA was  
421 then generated using SuperScript IV Reverse Transcriptase (Thermo Fisher cat #18090050)  
422 according to the manufacturer's instructions using 0.5µl of RiboLock RNase Inhibitor  
423 (Thermo Scientific cat #EO0381) and 0.5µl of SuperScript IV Reverse Transcriptase per  
424 sample.

425

426 **qRT-PCR**

427

428 The 96 well qPCR reaction plates were set up using the Power SYBR Green qPCR mix  
429 (Thermo Fisher cat #4367659) according to the manufacturer's protocol, using a 10 $\mu$ l total  
430 reaction volume. The 96 well qPCR plate was run on the StepOnePlus real-time PCR  
431 machine (Thermo Fisher cat #4376600). Cycle threshold (Ct) values were calculated on the  
432 StepOnePlus PCR machine software and further analysed using the statistical analysis  
433 software, Prism 8.

434

435 384 well qPCR reaction plates for the multiplexed activation of endogenous genes (Figure 5  
436 and 6) were set up using the Brilliant II SYBR master mix (Agilent cat #600828) according  
437 to the manufacturer's protocol, using a 4  $\mu$ l total reaction volume. Samples were loaded on a  
438 384 multiwell plate (Roche cat #04729749001) and ran on the Lightcycler 480 qPCR  
439 machine. The Ct values were calculated on the Lightcycler software and further analysed  
440 using the statistical analysis software, Prism 8.

441

## 442 **Acknowledgements**

443

444 This work was supported by the BBSRC (BB/M018040/1). We wish to thank Dr Tessa  
445 Moses for her discussion and advice, Sam Haynes for advice on statistical approaches as well  
446 as Dr Mathew Dale, Jessica Birt and Trevor Ho for their comments on the initial manuscript.

447

448

## 449 **References**

450 Anders, C., Niewoehner, O., Duerst, A., Jinek, M., 2014. Structural basis of PAM-dependent  
451 target DNA recognition by the Cas9 endonuclease. *Nature* 513, 569–573.

452 <https://doi.org/10.1038/nature13579>

453 Becskei, A., 2020. Tuning up Transcription Factors for Therapy. *Molecules* 25.

454 <https://doi.org/10.3390/molecules25081902>

455 Campa, C.C., Weisbach, N.R., Santinha, A.J., Incarnato, D., Platt, R.J., 2019. Multiplexed  
456 genome engineering by Cas12a and CRISPR arrays encoded on single transcripts. *Nat*  
457 *Methods* 16, 887–893. <https://doi.org/10.1038/s41592-019-0508-6>

458 Chakraborty, S., Ji, H., Kabadi, A.M., Gersbach, C.A., Christoforou, N., Leong, K.W., 2014.  
459 A CRISPR/Cas9-Based System for Reprogramming Cell Lineage Specification. *Stem*  
460 *Cell Reports* 3, 940–947. <https://doi.org/10.1016/j.stemcr.2014.09.013>

461 Creutzburg, S.C.A., Wu, W.Y., Mohanraju, P., Swartjes, T., Alkan, F., Gorodkin, J., Staals,  
462 R.H.J., van der Oost, J., 2020. Good guide, bad guide: spacer sequence-dependent  
463 cleavage efficiency of Cas12a. *Nucleic Acids Res* 48, 3228–3243.

464 <https://doi.org/10.1093/nar/gkz1240>

- 465 Fonfara, I., Richter, H., Bratovič, M., Le Rhun, A., Charpentier, E., 2016. The CRISPR-  
466 associated DNA-cleaving enzyme Cpf1 also processes precursor CRISPR RNA.  
467 Nature 532, 517–521. <https://doi.org/10.1038/nature17945>
- 468 Gilbert, L.A., Horlbeck, M.A., Adamson, B., Villalta, J.E., Chen, Y., Whitehead, E.H.,  
469 Guimaraes, C., Panning, B., Ploegh, H.L., Bassik, M.C., Qi, L.S., Kampmann, M.,  
470 Weissman, J.S., 2014. Genome-Scale CRISPR-Mediated Control of Gene Repression  
471 and Activation. Cell 159, 647–661. <https://doi.org/10.1016/j.cell.2014.09.029>
- 472 Gilbert, L.A., Larson, M.H., Morsut, L., Liu, Z., Brar, G.A., Torres, S.E., Stern-Ginossar, N.,  
473 Brandman, O., Whitehead, E.H., Doudna, J.A., Lim, W.A., Weissman, J.S., Qi, L.S.,  
474 2013. CRISPR-Mediated Modular RNA-Guided Regulation of Transcription in  
475 Eukaryotes. Cell 154, 442–451. <https://doi.org/10.1016/j.cell.2013.06.044>
- 476 Hilton, I.B., D’Ippolito, A.M., Vockley, C.M., Thakore, P.I., Crawford, G.E., Reddy, T.E.,  
477 Gersbach, C.A., 2015. Epigenome editing by a CRISPR-Cas9-based acetyltransferase  
478 activates genes from promoters and enhancers. Nature Biotechnology 33, 510–517.  
479 <https://doi.org/10.1038/nbt.3199>
- 480 Jacobsen, T., Ttofali, F., Liao, C., Manchalu, S., Gray, B.N., Beisel, C.L., 2020.  
481 Characterization of Cas12a nucleases reveals diverse PAM profiles between closely-  
482 related orthologs. Nucleic Acids Res 48, 5624–5638.  
483 <https://doi.org/10.1093/nar/gkaa272>
- 484 Jinek, M., Chylinski, K., Fonfara, I., Hauer, M., Doudna, J.A., Charpentier, E., 2012. A  
485 Programmable Dual-RNA-Guided DNA Endonuclease in Adaptive Bacterial  
486 Immunity. Science 337, 816–821. <https://doi.org/10.1126/science.1225829>
- 487 Kempton, H.R., Goudy, L.E., Love, K.S., Qi, L.S., 2020. Multiple Input Sensing and Signal  
488 Integration Using a Split Cas12a System. Molecular Cell 78, 184-191.e3.  
489 <https://doi.org/10.1016/j.molcel.2020.01.016>
- 490 Kim, D., Kim, J., Hur, J.K., Been, K.W., Yoon, S., Kim, J.-S., 2016. Genome-wide analysis  
491 reveals specificities of Cpf1 endonucleases in human cells. Nature Biotechnology 34,  
492 863–868. <https://doi.org/10.1038/nbt.3609>
- 493 Kim, H.K., Song, M., Lee, J., Menon, A.V., Jung, S., Kang, Y.-M., Choi, J.W., Woo, E.,  
494 Koh, H.C., Nam, J.-W., Kim, H., 2017. *In vivo* high-throughput profiling of CRISPR-  
495 Cpf1 activity. Nature Methods 14, 153–159. <https://doi.org/10.1038/nmeth.4104>
- 496 Kleinjan, D.A., Wardrope, C., Sou, S.N., Rosser, S.J., 2017. Drug-tunable multidimensional  
497 synthetic gene control using inducible degron-tagged dCas9 effectors. Nat Commun  
498 8, 1–9. <https://doi.org/10.1038/s41467-017-01222-y>
- 499 Krawczyk, K., Scheller, L., Kim, H., Fussenegger, M., 2020. Rewiring of endogenous  
500 signaling pathways to genomic targets for therapeutic cell reprogramming. Nat  
501 Commun 11, 608. <https://doi.org/10.1038/s41467-020-14397-8>
- 502 Lizio, M., Harshbarger, J., Shimoji, H., Severin, J., Kasukawa, T., Sahin, S., Abugessaisa, I.,  
503 Fukuda, S., Hori, F., Ishikawa-Kato, S., Mungall, C.J., Arner, E., Baillie, J.K., Bertin,  
504 N., Bono, H., de Hoon, M., Diehl, A.D., Dimont, E., Freeman, T.C., Fujieda, K.,  
505 Hide, W., Kaliyaperumal, R., Katayama, T., Lassmann, T., Meehan, T.F., Nishikata,  
506 K., Ono, H., Rehli, M., Sandelin, A., Schultes, E.A., ’t Hoen, P.A.C., Tatum, Z.,  
507 Thompson, M., Toyoda, T., Wright, D.W., Daub, C.O., Itoh, M., Carninci, P.,  
508 Hayashizaki, Y., Forrest, A.R.R., Kawaji, H., FANTOM consortium, 2015. Gateways  
509 to the FANTOM5 promoter level mammalian expression atlas. Genome Biol. 16, 22.  
510 <https://doi.org/10.1186/s13059-014-0560-6>
- 511 Maeder, M.L., Linder, S.J., Cascio, V.M., Fu, Y., Ho, Q.H., Joung, J.K., 2013. CRISPR  
512 RNA-guided activation of endogenous human genes. Nature Methods 10, 977–979.  
513 <https://doi.org/10.1038/nmeth.2598>

- 514 Mali, P., Yang, L., Esvelt, K.M., Aach, J., Guell, M., DiCarlo, J.E., Norville, J.E., Church,  
515 G.M., 2013. RNA-Guided Human Genome Engineering via Cas9. *Science* 339, 823–  
516 826. <https://doi.org/10.1126/science.1232033>
- 517 Nakamura, M., Srinivasan, P., Chavez, M., Carter, M.A., Dominguez, A.A., La Russa, M.,  
518 Lau, M.B., Abbott, T.R., Xu, X., Zhao, D., Gao, Y., Kipniss, N.H., Smolke, C.D.,  
519 Bondy-Denomy, J., Qi, L.S., 2019. Anti-CRISPR-mediated control of gene editing  
520 and synthetic circuits in eukaryotic cells. *Nat Commun* 10.  
521 <https://doi.org/10.1038/s41467-018-08158-x>
- 522 Orioli, A., Pascali, C., Quartararo, J., Diebel, K.W., Praz, V., Romascano, D., Percudani, R.,  
523 van Dyk, L.F., Hernandez, N., Teichmann, M., Dieci, G., 2011. Widespread  
524 occurrence of non-canonical transcription termination by human RNA polymerase III.  
525 *Nucleic Acids Res* 39, 5499–5512. <https://doi.org/10.1093/nar/gkr074>
- 526 Pandelakis, M., Delgado, E., Ebrahimkhani, M.R., 2020. CRISPR-Based Synthetic  
527 Transcription Factors In Vivo: The Future of Therapeutic Cellular Programming. *Cell*  
528 *Systems* 10, 1–14. <https://doi.org/10.1016/j.cels.2019.10.003>
- 529 Perez-Pinera, P., Kocak, D.D., Vockley, C.M., Adler, A.F., Kabadi, A.M., Polstein, L.R.,  
530 Thakore, P.I., Glass, K.A., Ousterout, D.G., Leong, K.W., Guilak, F., Crawford, G.E.,  
531 Reddy, T.E., Gersbach, C.A., 2013. RNA-guided gene activation by CRISPR-Cas9-  
532 based transcription factors. *Nat. Methods* 10, 973–976.  
533 <https://doi.org/10.1038/nmeth.2600>
- 534 Tak, Y.E., Kleinstiver, B.P., Nuñez, J.K., Hsu, J.Y., Horng, J.E., Gong, J., Weissman, J.S.,  
535 Joung, J.K., 2017. Inducible and multiplex gene regulation using CRISPR–Cpf1-  
536 based transcription factors. *Nature Methods* 14, 1163–1166.  
537 <https://doi.org/10.1038/nmeth.4483>
- 538 Tu, M., Lin, L., Cheng, Y., He, X., Sun, H., Xie, H., Fu, J., Liu, C., Li, J., Chen, D., Xi, H.,  
539 Xue, D., Liu, Q., Zhao, J., Gao, C., Song, Z., Qu, J., Gu, F., 2017. A ‘new lease of  
540 life’: FnCpf1 possesses DNA cleavage activity for genome editing in human cells.  
541 *Nucleic Acids Res* 45, 11295–11304. <https://doi.org/10.1093/nar/gkx783>
- 542 Zetsche, B., Gootenberg, J.S., Abudayyeh, O.O., Slaymaker, I.M., Makarova, K.S.,  
543 Essletzbichler, P., Volz, S.E., Joung, J., van der Oost, J., Regev, A., Koonin, E.V.,  
544 Zhang, F., 2015. Cpf1 is a single RNA-guided endonuclease of a class 2 CRISPR-Cas  
545 system. *Cell* 163, 759–771. <https://doi.org/10.1016/j.cell.2015.09.038>
- 546 Zetsche, B., Heidenreich, M., Mohanraju, P., Fedorova, I., Kneppers, J., DeGennaro, E.M.,  
547 Winblad, N., Choudhury, S.R., Abudayyeh, O.O., Gootenberg, J.S., Wu, W.Y., Scott,  
548 D.A., Severinov, K., van der Oost, J., Zhang, F., 2017. Multiplex gene editing by  
549 CRISPR-Cpf1 through autonomous processing of a single crRNA array. *Nat*  
550 *Biotechnol* 35, 31–34. <https://doi.org/10.1038/nbt.3737>  
551
